# Supplementary material for: Dependence of the structures and chemical ordering of Pd–Pt nanoalloys on potential parameters
Source: Royal Society of Chemistry journal article supplement (doi:10.1039/b805147j), 2008-01-01
Supplement: b805147j.pdf [file b805147j.pdf]

## Supplementary Material

### Dependence of the Structures and Chemical Ordering of Pd-Pt Nanoalloys on Potential

#### Parameters

*Lauro Oliver Paz-Borbón<sup>1</sup>, Abhishek Gupta<sup>2</sup> and Roy L. Johnston<sup>1\*</sup>,*

<sup>1</sup>School of Chemistry, University of Birmingham, Edgbaston, Birmingham, B15 2TT, United Kingdom

<sup>2</sup>Department of Physics, Indian Institute of Technology, New Delhi, India

| Parameters          | $w = 0.0$ | $w = 0.1$ | $w = 0.2$ | $w = 0.3$ | $w = 0.4$ | $w = 0.5$ |
|---------------------|-----------|-----------|-----------|-----------|-----------|-----------|
| $A / \text{eV}$     | 0.2975    | 0.28521   | 0.27292   | 0.26063   | 0.24834   | 0.23605   |
| $\zeta / \text{eV}$ | 2.695     | 2.5973    | 2.4996    | 2.4019    | 2.3042    | 2.2065    |
| $p$                 | 10.612    | 10.6375   | 10.663    | 10.6885   | 10.714    | 10.7395   |
| $q$                 | 4.004     | 3.9778    | 3.9516    | 3.9254    | 3.8992    | 3.873     |
| $r_o / \text{\AA}$  | 2.7747    | 2.77208   | 2.76946   | 2.76684   | 2.76422   | 2.7616    |
|                     | $w = 0.6$ | $w = 0.7$ | $w = 0.8$ | $w = 0.9$ | $w = 1.0$ |           |
| $A / \text{eV}$     | 0.22376   | 0.21147   | 0.19918   | 0.18689   | 0.1746    |           |
| $\zeta / \text{eV}$ | 2.1088    | 2.0111    | 1.9134    | 1.8157    | 1.718     |           |
| $p$                 | 10.765    | 10.7905   | 10.816    | 10.8415   | 10.867    |           |
| $q$                 | 3.8468    | 3.8206    | 3.7944    | 3.7682    | 3.742     |           |
| $r_o / \text{\AA}$  | 2.75898   | 2.75636   | 2.75374   | 2.75112   | 2.7485    |           |

**Table S1.** Weighted Pd-Pt Gupta potential parameters.

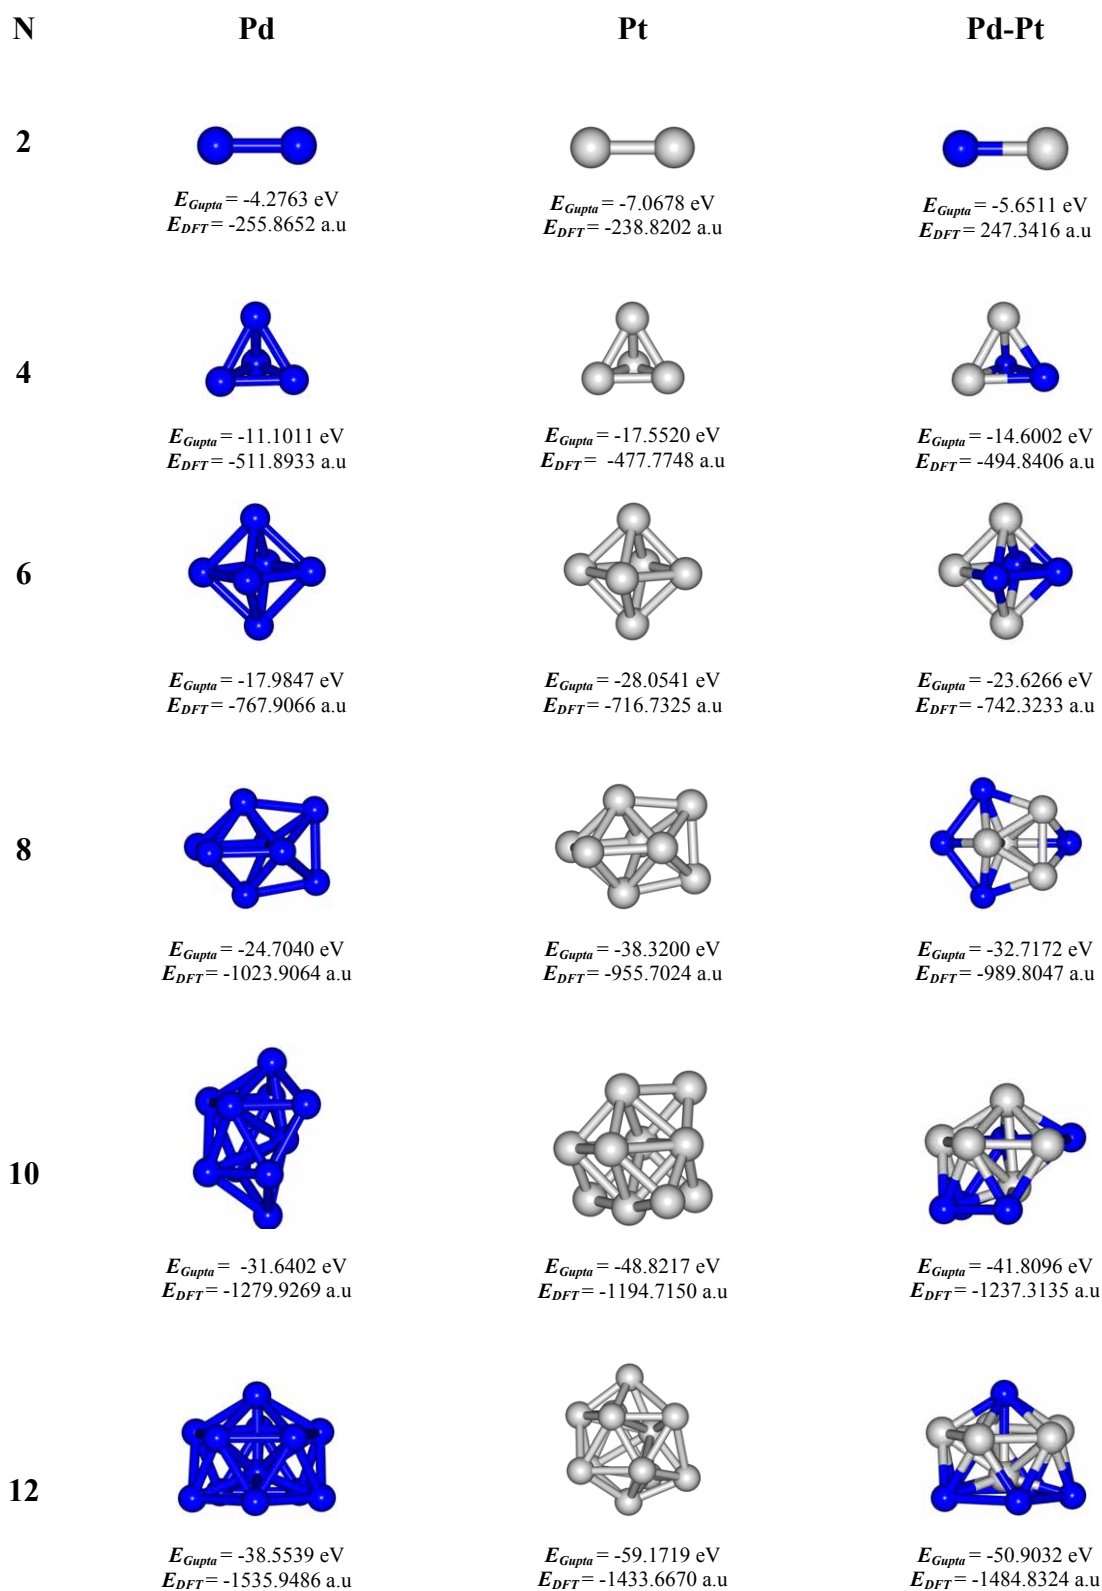

**Figure S1.** GM structures found by optimized by DFT for  $\text{Pd}_N$ ,  $\text{Pt}_N$  and  $(\text{Pd-Pt})_{N/2}$  clusters for  $N = 2-20$  atoms. Parameter set **Ia** was used for the combined GA-Gupta global optimization calculations. Gupta potential and Density Functional Theory (DFT) cluster total energies are denoted by  $E_{Gupta}$  and  $E_{DFT}$ , respectively.

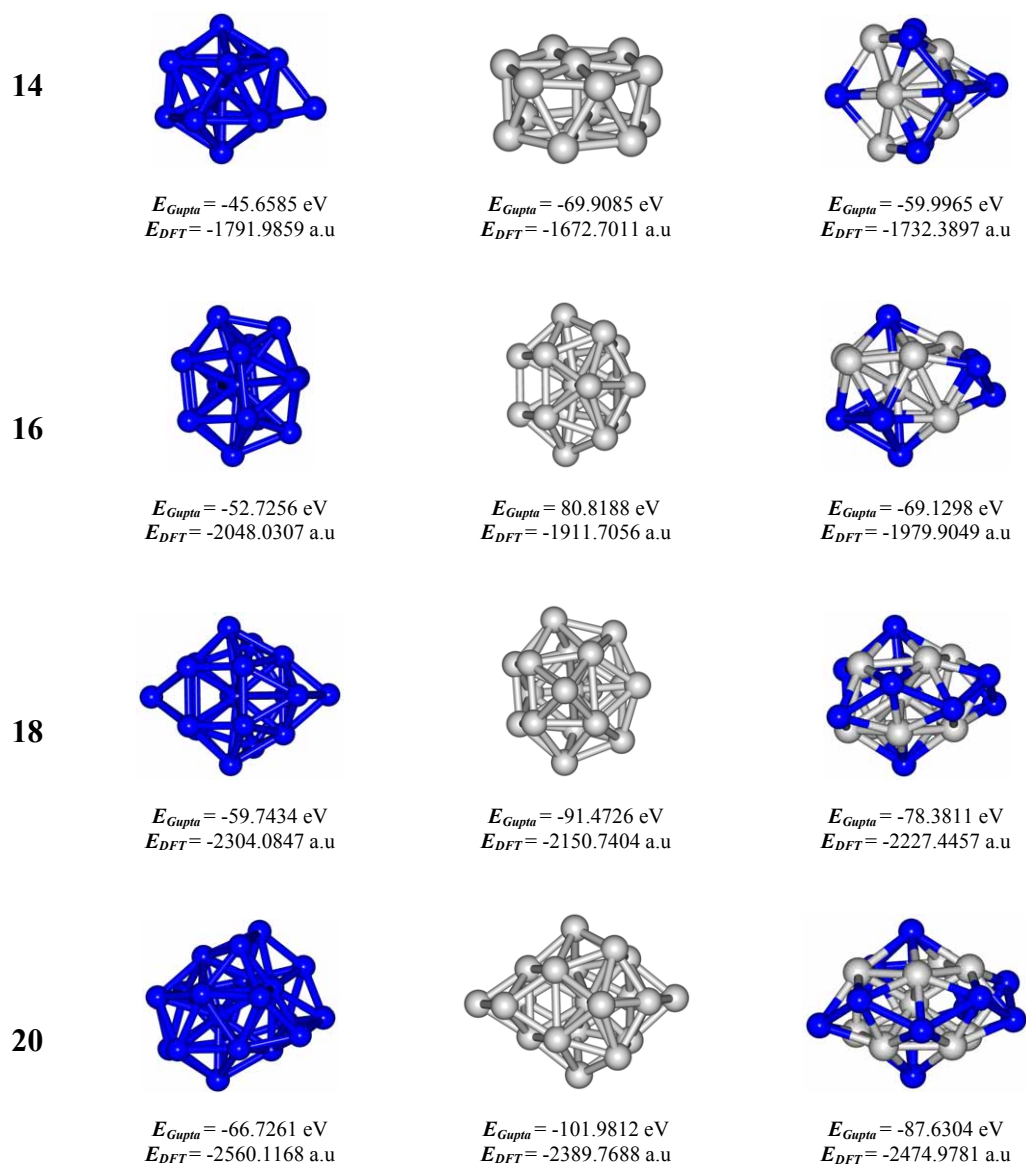

**Figure S1.** (continued) GM structures found by optimized by DFT for  $\text{Pd}_N$ ,  $\text{Pt}_N$  and  $(\text{Pd-Pt})_{N/2}$  clusters for  $N = 2-20$  atoms. Parameter set **Ia** was used for the combined GA-Gupta global optimization calculations. Gupta potential and Density Functional Theory (DFT) cluster total energies are denoted by  $E_{Gupta}$  and  $E_{DFT}$ , respectively.

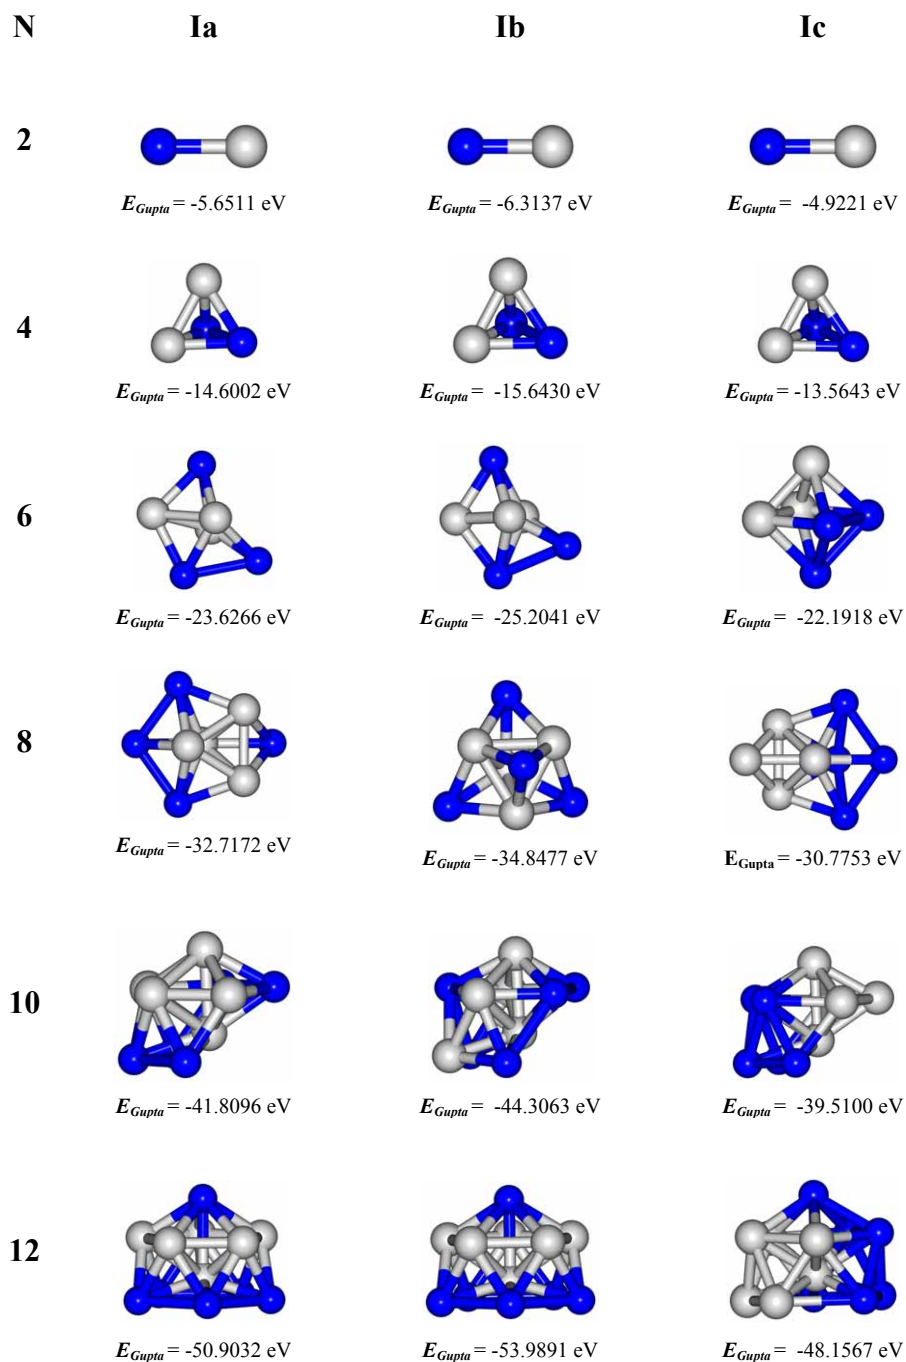

**Figure S2.** Comparison of structures and chemical ordering in  $(\text{Pd-Pt})_{N/2}$  clusters (for  $N = 2-20$ ) using Gupta parameter sets **Ia** ( $w = 0.5$ ), **Ib** ( $w = 0.25$ ) and **Ic** ( $w = 0.75$ ). Gupta potential cluster total energies are denoted by  $E_{Gupta}$ .

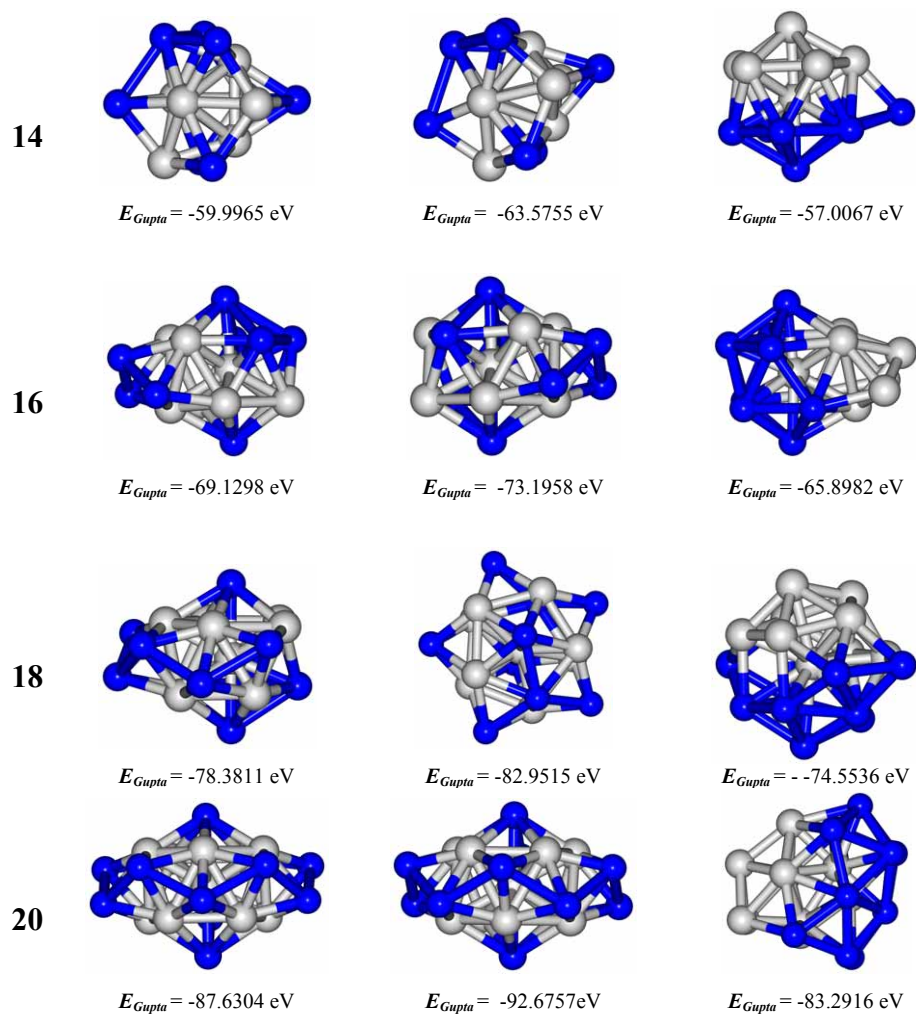

**Figure S2.** (continued) Comparison of structures and chemical ordering in  $(\text{Pd-Pt})_{N/2}$  clusters (for  $N = 2-20$ ) using Gupta parameter sets **Ia** ( $w = 0.5$ ), **Ib** ( $w = 0.25$ ) and **Ic** ( $w = 0.75$ ). Gupta potential cluster total energies are denoted by  $E_{Gupta}$ .

| $m$ | $w = 0.5$<br>( <b>I=Ia</b> ) | $w = 0.25$<br>( <b>Ib</b> ) | $w = 0.75$<br>( <b>Ic</b> ) |
|-----|------------------------------|-----------------------------|-----------------------------|
| 0   | 0                            | 0                           | 0                           |
| 1   | -0.39642                     | -1.01966                    | 0.26429                     |
| 2   | -0.76776                     | -2.02695                    | 0.37882                     |
| 3   | -1.15112                     | -3.03083                    | 0.49056                     |
| 4   | -1.51217                     | -4.02219                    | 0.61086                     |
| 5   | -1.86421                     | -5.0096                     | 0.66161                     |
| 6   | -2.20773                     | -5.99083                    | 0.77913                     |
| 7   | -2.5036                      | -6.97172                    | 0.89549                     |
| 8   | -2.81745                     | -7.92706                    | 0.95401                     |
| 9   | -3.28038                     | -8.79767                    | 1.13155                     |
| 10  | -3.61876                     | -9.64389                    | 1.13886                     |
| 11  | -3.94095                     | -10.48695                   | 1.2143                      |
| 12  | -4.23176                     | -11.17044                   | 1.3538                      |
| 13  | -4.49413                     | -11.7621                    | 1.38263                     |
| 14  | -4.71513                     | -12.37177                   | 1.39185                     |
| 15  | -4.88588                     | -12.77864                   | 1.41484                     |
| 16  | -5.02678                     | -13.21403                   | 1.37258                     |
| 17  | -5.13846                     | -13.53048                   | 1.42971                     |
| 18  | -5.25458                     | -13.99968                   | 1.48437                     |
| 19  | -5.34056                     | -14.15175                   | 1.52644                     |
| 20  | -5.49545                     | -14.46693                   | 1.62924                     |
| 21  | -5.66665                     | -14.89698                   | 1.64461                     |
| 22  | -5.53617                     | -15.02801                   | 1.68185                     |
| 23  | -5.4908                      | -14.4925                    | 1.64364                     |
| 24  | -5.5527                      | -13.93693                   | 1.50325                     |
| 25  | -5.22517                     | -13.29678                   | 1.55289                     |
| 26  | -4.98501                     | -12.863                     | 1.4951                      |
| 27  | -4.80734                     | -12.09242                   | 1.44254                     |
| 28  | -4.58619                     | -11.34402                   | 1.34171                     |
| 29  | -4.21343                     | -10.35142                   | 1.07872                     |
| 30  | -3.83459                     | -9.34424                    | 1.18415                     |
| 31  | -2.94599                     | -7.56053                    | 1.1324                      |
| 32  | -1.91988                     | -5.11106                    | 0.94808                     |
| 33  | -0.94286                     | -2.44698                    | 0.60517                     |
| 34  | 0                            | 0                           | 0                           |

**Table S2.** Excess energy  $\Delta_{34}^{Gupta}$  values for weighted **Ia**, **Ib** and **Ic** Pd-Pt Gupta potential parameters.

| <i>m</i> | <i>w</i> = 0 | <i>w</i> = 0.1 | <i>w</i> = 0.2 | <i>w</i> = 0.3 | <i>w</i> = 0.4 | <i>w</i> = 0.5 |
|----------|--------------|----------------|----------------|----------------|----------------|----------------|
| 0        | 0.00000      | 0.00000        | 0.00000        | 0.00000        | 0.00000        | 0.00000        |
| 1        | -1.79142     | -1.47095       | -1.16642       | -0.87657       | -0.60028       | -0.33651       |
| 2        | -3.58284     | -2.93717       | -2.32308       | -1.73807       | -1.17985       | -0.65607       |
| 3        | -5.37425     | -4.40238       | -3.47733       | -2.59502       | -1.75300       | -0.97144       |
| 4        | -7.16565     | -5.86088       | -4.62047       | -3.43860       | -2.32130       | -1.28434       |
| 5        | -8.95609     | -7.31733       | -5.76038       | -4.27747       | -2.88414       | -1.58136       |
| 6        | -10.74479    | -8.76966       | -6.89511       | -5.11229       | -3.43714       | -1.87457       |
| 7        | -12.52764    | -10.22125      | -8.02942       | -5.94000       | -3.96017       | -2.21678       |
| 8        | -14.30708    | -11.65340      | -9.14032       | -6.74330       | -4.45701       | -2.50066       |
| 9        | -16.06414    | -13.05941      | -10.23037      | -7.63559       | -4.99134       | -2.78404       |
| 10       | -17.60753    | -14.29236      | -11.36188      | -8.19134       | -5.48853       | -3.05553       |
| 11       | -19.10822    | -15.52921      | -12.13633      | -8.91368       | -5.97764       | -3.32681       |
| 12       | -20.50207    | -16.57235      | -12.88340      | -9.52917       | -6.44978       | -3.56974       |
| 13       | -21.67322    | -17.52306      | -13.58245      | -10.03839      | -6.78903       | -3.79644       |
| 14       | -22.79106    | -18.38291      | -14.24218      | -10.43920      | -7.09939       | -4.00066       |
| 15       | -23.74606    | -19.11625      | -14.82350      | -10.83268      | -7.34474       | -4.15183       |
| 16       | -24.54731    | -19.86792      | -15.37552      | -11.17346      | -7.52510       | -4.27221       |
| 17       | -25.23610    | -20.41653      | -15.78646      | -11.42202      | -7.78994       | -4.37586       |
| 18       | -25.53841    | -21.04733      | -16.39914      | -11.75333      | -7.89050       | -4.47331       |
| 19       | -26.03168    | -21.18634      | -16.49859      | -12.04466      | -8.00555       | -4.56907       |
| 20       | -26.09738    | -21.23602      | -16.68455      | -12.29376      | -8.29140       | -4.69758       |
| 21       | -26.55824    | -21.78451      | -17.15663      | -12.70022      | -8.44009       | -4.79261       |
| 22       | -26.57585    | -21.84368      | -17.26219      | -12.83837      | -8.58048       | -4.78921       |
| 23       | -25.83920    | -21.18414      | -16.68397      | -12.34688      | -8.18274       | -4.75719       |
| 24       | -25.04467    | -20.48530      | -16.08051      | -11.83905      | -8.11093       | -4.74070       |
| 25       | -24.11176    | -19.67140      | -15.38312      | -11.25753      | -7.65555       | -4.54639       |
| 26       | -22.75698    | -18.54469      | -14.48636      | -11.04478      | -7.54132       | -4.34291       |
| 27       | -21.20212    | -17.43587      | -13.83396      | -10.39491      | -7.12754       | -4.10255       |
| 28       | -19.96086    | -16.33121      | -12.96750      | -9.76349       | -6.72599       | -3.78906       |
| 29       | -18.33189    | -15.00139      | -11.82823      | -8.91413       | -6.15234       | -3.53801       |
| 30       | -16.40381    | -13.42515      | -10.67173      | -8.05266       | -5.57114       | -3.23240       |
| 31       | -13.68559    | -11.14764      | -8.71933       | -6.48679       | -4.41256       | -2.43763       |
| 32       | -9.18050     | -7.47271       | -5.88056       | -4.36109       | -2.91420       | -1.60890       |
| 33       | -4.47310     | -3.63488       | -2.83389       | -2.08323       | -1.42440       | -0.79599       |
| 34       | 0.00000      | 0.00000        | 0.00000        | 0.00000        | 0.00000        | 0.00000        |

**Table S3.** Excess energy  $\Delta_{34}^{Gupta}$  values for weighted Pd-Pt Gupta potential parameters in the range  $0 \leq w \leq 1$ .

| <i>m</i> | <i>w</i> = 0.6 | <i>w</i> = 0.7 | <i>w</i> = 0.8 | <i>w</i> = 0.9 | <i>w</i> = 1 |
|----------|----------------|----------------|----------------|----------------|--------------|
| 0        | 0.00000        | 0.00000        | 0.00000        | 0.00000        | 0.00000      |
| 1        | -0.08434       | 0.15398        | 0.37325        | 0.58344        | 0.78515      |
| 2        | -0.22161       | 0.18600        | 0.56660        | 0.91968        | 1.24456      |
| 3        | -0.28128       | 0.25316        | 0.71948        | 1.14317        | 1.52476      |
| 4        | -0.36887       | 0.29817        | 0.91358        | 1.45430        | 1.88362      |
| 5        | -0.48226       | 0.29953        | 1.00902        | 1.56315        | 1.99187      |
| 6        | -0.59855       | 0.34125        | 1.14354        | 1.74824        | 2.27903      |
| 7        | -0.71856       | 0.48990        | 1.26841        | 1.94913        | 2.46203      |
| 8        | -0.76579       | 0.46549        | 1.31547        | 1.97461        | 2.55667      |
| 9        | -0.88615       | 0.54264        | 1.55288        | 2.28341        | 2.74216      |
| 10       | -0.96344       | 0.50796        | 1.64604        | 2.32902        | 2.80515      |
| 11       | -1.03358       | 0.64497        | 1.74857        | 2.42602        | 2.86710      |
| 12       | -1.10589       | 0.69530        | 1.85228        | 2.44645        | 2.87390      |
| 13       | -1.21829       | 0.75185        | 1.90479        | 2.59586        | 3.11954      |
| 14       | -1.24560       | 0.69202        | 1.82439        | 2.52110        | 3.12557      |
| 15       | -1.30612       | 0.70055        | 1.89678        | 2.67120        | 3.23024      |
| 16       | -1.38298       | 0.67897        | 1.91477        | 2.74178        | 3.21560      |
| 17       | -1.48845       | 0.66891        | 1.98327        | 2.75584        | 3.27023      |
| 18       | -1.48984       | 0.66115        | 2.05465        | 2.77958        | 3.28404      |
| 19       | -1.55045       | 0.71312        | 2.16094        | 2.85924        | 3.41633      |
| 20       | -1.62211       | 0.75605        | 2.14123        | 2.84390        | 3.34081      |
| 21       | -1.74369       | 0.81561        | 2.14652        | 2.83701        | 3.36468      |
| 22       | -1.81764       | 0.75379        | 2.12162        | 2.77726        | 3.30457      |
| 23       | -1.82622       | 0.73806        | 2.05820        | 2.68990        | 3.21505      |
| 24       | -1.83312       | 0.73342        | 1.94882        | 2.58491        | 3.13431      |
| 25       | -1.76966       | 0.72260        | 1.93740        | 2.57952        | 3.08968      |
| 26       | -1.73288       | 0.67697        | 1.97049        | 2.53331        | 3.02244      |
| 27       | -1.70248       | 0.48103        | 1.82387        | 2.35329        | 2.79489      |
| 28       | -1.55336       | 0.48669        | 1.68982        | 2.27892        | 2.79689      |
| 29       | -1.49234       | 0.39379        | 1.77025        | 2.19165        | 2.56341      |
| 30       | -1.12938       | 0.45664        | 1.61427        | 2.18298        | 2.54501      |
| 31       | -0.78882       | 0.51992        | 1.62154        | 2.06762        | 2.43501      |
| 32       | -0.45927       | 0.50220        | 1.38160        | 1.87084        | 2.23700      |
| 33       | -0.19782       | 0.34956        | 0.85651        | 1.33698        | 1.79142      |
| 34       | 0.00000        | 0.00000        | 0.00000        | 0.00000        | 0.00000      |

**Table S3.** (continued) Excess energy  $\Delta_{34}^{Gupta}$  values for weighted Pd-Pt Gupta potential parameters in the range  $0 \leq w \leq 1$ .



| $x$   | $\frac{A_{cap}}{\pi R^2} = \gamma(2 - \gamma)$ | $\frac{A_{core}}{\pi R^2} = x^{2/3}$ | $\frac{A_{core}}{A_{cap}} = \frac{4x^{2/3}}{\gamma(2 - \gamma)} = \eta$ |
|-------|------------------------------------------------|--------------------------------------|-------------------------------------------------------------------------|
| 0     | 0                                              | 0                                    | 0                                                                       |
| 0.007 | 0.19                                           | 0.148                                | 0.779                                                                   |
| 0.028 | 0.36                                           | 0.368                                | 1.022                                                                   |
| 0.061 | 0.51                                           | 0.620                                | 1.216                                                                   |
| 0.104 | 0.64                                           | 0.884                                | 1.381                                                                   |
| 0.156 | 0.75                                           | 1.160                                | 1.547                                                                   |
| 0.216 | 0.84                                           | 1.440                                | 1.714                                                                   |
| 0.282 | 0.91                                           | 1.720                                | 1.89                                                                    |
| 0.352 | 0.96                                           | 1.996                                | 2.079                                                                   |
| 0.425 | 0.99                                           | 2.260                                | 2.283                                                                   |
| 0.500 | 1.00                                           | 2.520                                | 2.52                                                                    |
| 0.575 | 0.99                                           | 2.764                                | 2.792                                                                   |
| 0.648 | 0.96                                           | 2.996                                | 3.121                                                                   |
| 0.718 | 0.91                                           | 3.208                                | 3.525                                                                   |
| 0.784 | 0.84                                           | 3.400                                | 4.048                                                                   |
| 0.844 | 0.75                                           | 3.572                                | 4.763                                                                   |
| 0.896 | 0.64                                           | 3.716                                | 5.806                                                                   |
| 0.939 | 0.51                                           | 3.836                                | 7.522                                                                   |
| 0.972 | 0.36                                           | 3.924                                | 10.90                                                                   |
| 0.993 | 0.19                                           | 3.980                                | 20.947                                                                  |
| 1     | 0                                              | 4                                    | $\infty$                                                                |

**Table S4.** Numerical values for  $x$ ,  $A_{cap}$ ,  $A_{core}$  and the ratio  $A_{core}/A_{cap}$  (see Section 2.5 and the Appendix).
